# Supplementary material for: Effects of Selected Prebiotics or Synbiotics Administered in ovo on Lymphocyte Subsets in Bursa of the Fabricius, Thymus, and Spleen in Non-Immunized and Immunized Chicken Broilers
Source: PubMed Central journal article supplement (PMC7917990; doi:10.3390/ani11020476), 2021-02-11
Supplement: animals-11-00476-s001.pdf [file animals-11-00476-s001.pdf]

# Supplementary Materials: Effects of Selected Prebiotics or Synbiotics Administered *in ovo* on Lymphocyte Subsets in Bursa of Fabricius, Thymus and Spleen in Non-Immunized and Immunized Chicken Broilers

Marianna Szczypka, Agnieszka Suszko-Pawłowska, Maciej Kuczkowski, Michał Gorczykowski, Magdalena Lis, Artur Kowalczyk, Ewa Łukasiewicz, Dominik Poradowski, Iwona Zbyryt, Marek Bednarczyk and Tadeusz Stefaniak

**Table S1.** The percentage (%) of lymphocyte subsets in the bursa of Fabricius of 7-day-old chicken broilers after *in ovo* injection of the investigated prebiotics or synbiotics. The values are presented as mean  $\pm$  S.D.;  $n = 7$ . Data with different superscript letters show significant differences ( $p < 0.05$ ).

| Group       | Bu-1 <sup>+</sup>                | CD3 <sup>+</sup>                 |
|-------------|----------------------------------|----------------------------------|
| CONTROL     | 98.09 <sup>a</sup><br>$\pm 0.96$ | 0.84 <sup>a</sup><br>$\pm 0.36$  |
| PREBIOTIC 1 | 98.33 <sup>a</sup><br>$\pm 1.01$ | 0.51 <sup>ab</sup><br>$\pm 0.30$ |
| PREBIOTIC 2 | 98.79 <sup>a</sup><br>$\pm 0.51$ | 0.50 <sup>ab</sup><br>$\pm 0.13$ |
| SYNBIOTIC 1 | 98.59 <sup>a</sup><br>$\pm 0.53$ | 0.82 <sup>a</sup><br>$\pm 0.40$  |
| SYNBIOTIC 2 | 99.08 <sup>a</sup><br>$\pm 0.25$ | 0.32 <sup>b</sup><br>$\pm 0.09$  |

**Table S2.** The percentage (%) of lymphocyte subsets in the bursa of Fabricius of 21-day-old chicken broilers after *in ovo* injection of the investigated prebiotics or synbiotics. The values are presented as mean  $\pm$  S.D.;  $n = 7$ . Data with different superscript letters show significant differences ( $p < 0.05$ ).

|                | Group       | Bu-1 <sup>+</sup>                | CD3 <sup>+</sup>                |
|----------------|-------------|----------------------------------|---------------------------------|
| NON-IMMUNIZED  | CONTROL     | 96.99 <sup>a</sup><br>$\pm 0.53$ | 1.27 <sup>a</sup><br>$\pm 0.27$ |
|                | PREBIOTIC 1 | 93.87 <sup>a</sup><br>$\pm 6.05$ | 1.22 <sup>a</sup><br>$\pm 0.41$ |
|                | PREBIOTIC 2 | 96.67 <sup>a</sup><br>$\pm 2.22$ | 1.40 <sup>a</sup><br>$\pm 0.89$ |
|                | SYNBIOTIC 1 | 95.14 <sup>a</sup><br>$\pm 1.61$ | 1.77 <sup>a</sup><br>$\pm 0.78$ |
|                | SYNBIOTIC 2 | 96.45 <sup>a</sup><br>$\pm 1.90$ | 1.14 <sup>a</sup><br>$\pm 0.36$ |
| SRBC-IMMUNIZED | CONTROL     | 97.10 <sup>a</sup><br>$\pm 0.87$ | 1.34 <sup>a</sup><br>$\pm 0.82$ |
|                | PREBIOTIC 1 | 90.37 <sup>a</sup><br>$\pm 8.31$ | 1.45 <sup>a</sup><br>$\pm 0.33$ |
|                | PREBIOTIC 2 | 96.46 <sup>a</sup><br>$\pm 1.34$ | 1.40 <sup>a</sup><br>$\pm 0.37$ |
|                | SYNBIOTIC 1 | 94.67 <sup>a</sup><br>$\pm 2.85$ | 1.90 <sup>a</sup><br>$\pm 1.17$ |
|                | SYNBIOTIC 2 | 96.04 <sup>a</sup><br>$\pm 1.93$ | 1.28 <sup>a</sup><br>$\pm 0.39$ |

|               |             |                               |                             |
|---------------|-------------|-------------------------------|-----------------------------|
| DEX-IMMUNIZED | CONTROL     | 97.32 <sup>a</sup><br>± 0.56  | 1.30 <sup>a</sup><br>± 0.55 |
|               | PREBIOTIC 1 | 91.86 <sup>b</sup><br>± 5.28  | 1.41 <sup>a</sup><br>± 0.43 |
|               | PREBIOTIC 2 | 94.94 <sup>ab</sup><br>± 2.71 | 1.87 <sup>a</sup><br>± 0.85 |
|               | SYNBIOTIC 1 | 97.03 <sup>a</sup><br>± 1.25  | 1.02 <sup>a</sup><br>± 0.36 |
|               | SYNBIOTIC 2 | 97.21 <sup>ab</sup><br>± 1.89 | 1.00 <sup>a</sup><br>± 0.21 |

**Table S3.** The total count ( $\times 10^6$ ) of lymphocyte subsets in the bursa of Fabricius of 21-day-old chicken broilers after *in ovo* injection of the investigated prebiotics or synbiotics. The values are presented as mean  $\pm$  S.D.;  $n = 7$ . Data with different superscript letters show significant differences ( $p < 0.05$ ).

|                | Group       | Bu-1 <sup>+</sup>                | CD3 <sup>+</sup>              |
|----------------|-------------|----------------------------------|-------------------------------|
| NON-IMMUNIZED  | CONTROL     | 726.19 <sup>a</sup><br>± 180.06  | 9.44 <sup>a</sup><br>± 2.95   |
|                | PREBIOTIC 1 | 1041.59 <sup>a</sup><br>± 350.64 | 14.90 <sup>a</sup><br>± 11.19 |
|                | PREBIOTIC 2 | 1111.61 <sup>a</sup><br>± 302.90 | 14.39 <sup>a</sup><br>± 5.86  |
|                | SYNBIOTIC 1 | 1091.03 <sup>a</sup><br>± 292.89 | 20.30 <sup>a</sup><br>± 10.24 |
|                | SYNBIOTIC 2 | 880.21 <sup>a</sup><br>± 228.65  | 10.05 <sup>a</sup><br>± 2.60  |
| SRBC-IMMUNIZED | CONTROL     | 918.94 <sup>a</sup><br>± 184.15  | 13.53 <sup>a</sup><br>± 10.05 |
|                | PREBIOTIC 1 | 997.43 <sup>a</sup><br>± 257.93  | 15.39 <sup>a</sup><br>± 2.66  |
|                | PREBIOTIC 2 | 1003.55 <sup>a</sup><br>± 430.22 | 13.76 <sup>a</sup><br>± 4.75  |
|                | SYNBIOTIC 1 | 1011.77 <sup>a</sup><br>± 193.13 | 22.56 <sup>a</sup><br>± 18.60 |
|                | SYNBIOTIC 2 | 1066.20 <sup>a</sup><br>± 373.68 | 15.54 <sup>a</sup><br>± 11.45 |
| DEX-IMMUNIZED  | CONTROL     | 1075.55 <sup>a</sup><br>± 314.32 | 14.53 <sup>a</sup><br>± 7.59  |
|                | PREBIOTIC 1 | 1081.75 <sup>a</sup><br>± 333.10 | 18.02 <sup>a</sup><br>± 9.92  |
|                | PREBIOTIC 2 | 1169.17 <sup>a</sup><br>± 384.27 | 25.61 <sup>a</sup><br>± 22.12 |
|                | SYNBIOTIC 1 | 1040.66 <sup>a</sup><br>± 356.22 | 10.56 <sup>a</sup><br>± 5.18  |
|                | SYNBIOTIC 2 | 976.69 <sup>a</sup><br>± 241.55  | 10.17 <sup>a</sup><br>± 3.41  |

**Table S4.** The percentage (%) of lymphocyte subsets in the bursa of Fabricius of 35-day-old chicken broilers after *in ovo* injection of the investigated prebiotics or synbiotics. The values are presented as mean  $\pm$  S.D.;  $n = 7$ . Data with different superscript letters show significant differences ( $p < 0.05$ ).

|                | Group       | Bu-1 <sup>+</sup>                 | CD3 <sup>+</sup>                 |
|----------------|-------------|-----------------------------------|----------------------------------|
| NON-IMMUNIZED  | CONTROL     | 96.75 <sup>a</sup><br>$\pm 0.74$  | 1.01 <sup>a</sup><br>$\pm 0.39$  |
|                | PREBIOTIC 1 | 96.67 <sup>ab</sup><br>$\pm 1.00$ | 1.11 <sup>a</sup><br>$\pm 0.40$  |
|                | PREBIOTIC 2 | 94.48 <sup>ab</sup><br>$\pm 1.93$ | 1.29 <sup>a</sup><br>$\pm 0.53$  |
|                | SYNBIOTIC 1 | 93.23 <sup>b</sup><br>$\pm 3.60$  | 1.48 <sup>a</sup><br>$\pm 0.55$  |
|                | SYNBIOTIC 2 | 94.27 <sup>ab</sup><br>$\pm 2.62$ | 1.71 <sup>a</sup><br>$\pm 0.70$  |
| SRBC-IMMUNIZED | CONTROL     | 96.48 <sup>a</sup><br>$\pm 1.17$  | 1.22 <sup>ab</sup><br>$\pm 0.34$ |
|                | PREBIOTIC 1 | 97.15 <sup>a</sup><br>$\pm 0.53$  | 0.94 <sup>a</sup><br>$\pm 0.26$  |
|                | PREBIOTIC 2 | 92.48 <sup>ab</sup><br>$\pm 1.61$ | 1.21 <sup>ab</sup><br>$\pm 0.36$ |
|                | SYNBIOTIC 1 | 86.83 <sup>b</sup><br>$\pm 7.71$  | 3.75 <sup>b</sup><br>$\pm 3.68$  |
|                | SYNBIOTIC 2 | 96.15 <sup>a</sup><br>$\pm 3.30$  | 1.06 <sup>a</sup><br>$\pm 0.49$  |
| DEX-IMMUNIZED  | CONTROL     | 94.97 <sup>a</sup><br>$\pm 3.49$  | 1.23 <sup>a</sup><br>$\pm 0.24$  |
|                | PREBIOTIC 1 | 96.86 <sup>a</sup><br>$\pm 0.94$  | 1.31 <sup>a</sup><br>$\pm 0.65$  |
|                | PREBIOTIC 2 | 90.45 <sup>a</sup><br>$\pm 3.40$  | 1.34 <sup>a</sup><br>$\pm 0.43$  |
|                | SYNBIOTIC 1 | 93.82 <sup>a</sup><br>$\pm 3.51$  | 0.95 <sup>a</sup><br>$\pm 0.29$  |
|                | SYNBIOTIC 2 | 94.55 <sup>a</sup><br>$\pm 5.52$  | 1.61 <sup>a</sup><br>$\pm 0.80$  |

**Table S5.** The total count ( $\times 10^6$ ) of lymphocyte subsets in the bursa of Fabricius of 35-day-old chicken broilers after *in ovo* injection of the investigated prebiotics or synbiotics. The values are presented as mean  $\pm$  S.D.;  $n = 7$ . Data with different superscript letters show significant differences ( $p < 0.05$ ).

|                | Group       | Bu-1 <sup>+</sup>                     | CD3 <sup>+</sup>                   |
|----------------|-------------|---------------------------------------|------------------------------------|
| NON-IMMUNIZED  | CONTROL     | 1903.85 <sup>a</sup><br>$\pm 806.36$  | 20.68 <sup>a</sup><br>$\pm 13.03$  |
|                | PREBIOTIC 1 | 2529.71 <sup>a</sup><br>$\pm 711.40$  | 27.97 <sup>a</sup><br>$\pm 9.57$   |
|                | PREBIOTIC 2 | 4466.72 <sup>a</sup><br>$\pm 4024.52$ | 50.62 <sup>a</sup><br>$\pm 29.06$  |
|                | SYNBIOTIC 1 | 4911.93 <sup>a</sup><br>$\pm 3996.01$ | 86.17 <sup>a</sup><br>$\pm 82.45$  |
|                | SYNBIOTIC 2 | 3659.75 <sup>a</sup><br>$\pm 2340.16$ | 54.95 <sup>a</sup><br>$\pm 23.71$  |
| SRBC-IMMUNIZED | CONTROL     | 2294.20 <sup>a</sup><br>$\pm 753.55$  | 27.68 <sup>a</sup><br>$\pm 6.97$   |
|                | PREBIOTIC 1 | 3232.92 <sup>a</sup><br>$\pm 1770.65$ | 30.74 <sup>a</sup><br>$\pm 17.65$  |
|                | PREBIOTIC 2 | 5865.91 <sup>a</sup><br>$\pm 5017.82$ | 70.86 <sup>ab</sup><br>$\pm 62.13$ |
|                | SYNBIOTIC 1 | 5166.53 <sup>a</sup><br>$\pm 3769.91$ | 148.24 <sup>b</sup><br>$\pm 91.66$ |
|                | SYNBIOTIC 2 | 3687.07 <sup>a</sup><br>$\pm 2151.14$ | 33.57 <sup>a</sup><br>$\pm 14.59$  |
| DEX-IMMUNIZED  | CONTROL     | 2731.67 <sup>a</sup><br>$\pm 973.78$  | 32.47 <sup>a</sup><br>$\pm 13.33$  |
|                | PREBIOTIC 1 | 4343.64 <sup>a</sup><br>$\pm 2527.67$ | 56.62 <sup>a</sup><br>$\pm 44.43$  |
|                | PREBIOTIC 2 | 3958.61 <sup>a</sup><br>$\pm 1935.41$ | 55.98 <sup>a</sup><br>$\pm 30.67$  |
|                | SYNBIOTIC 1 | 5662.96 <sup>a</sup><br>$\pm 3996.53$ | 63.37 <sup>a</sup><br>$\pm 56.21$  |
|                | SYNBIOTIC 2 | 3544.82 <sup>a</sup><br>$\pm 1802.13$ | 57.46 <sup>a</sup><br>$\pm 25.58$  |

**Table S6.** The percentage (%) of lymphocyte subsets in the thymus of 21-day-old chicken broilers after *in ovo* injection of the investigated prebiotics or synbiotics. The values are presented as mean  $\pm$  S.D.;  $n = 7$ . Data with different superscript letters show significant differences ( $p < 0.05$ ).

|                | Group       | CD3 <sup>+</sup><br>TCR $\gamma\delta$ <sup>+</sup> | CD4 <sup>+</sup>                 | CD4 <sup>+</sup> 8 <sup>+</sup>   | CD4 <sup>+</sup>                | CD8 <sup>+</sup>                 | CD4 <sup>+</sup> /<br>CD8 <sup>+</sup> |
|----------------|-------------|-----------------------------------------------------|----------------------------------|-----------------------------------|---------------------------------|----------------------------------|----------------------------------------|
| NON-IMMUNIZED  | CONTROL     | 7.57 <sup>a</sup><br>$\pm 1.35$                     | 17.48 <sup>a</sup><br>$\pm 3.12$ | 72.30 <sup>ab</sup><br>$\pm 2.58$ | 4.69 <sup>a</sup><br>$\pm 1.35$ | 5.53 <sup>a</sup><br>$\pm 1.55$  | 0.95 <sup>a</sup><br>$\pm 0.51$        |
|                | PREBIOTIC 1 | 10.84 <sup>ab</sup><br>$\pm 6.01$                   | 15.54 <sup>a</sup><br>$\pm 4.75$ | 70.56 <sup>ab</sup><br>$\pm 5.78$ | 5.90 <sup>a</sup><br>$\pm 2.35$ | 7.99 <sup>b</sup><br>$\pm 1.33$  | 0.74 <sup>a</sup><br>$\pm 0.27$        |
|                | PREBIOTIC 2 | 9.84 <sup>ac</sup><br>$\pm 3.93$                    | 12.98 <sup>a</sup><br>$\pm 5.49$ | 77.54 <sup>a</sup><br>$\pm 7.57$  | 3.50 <sup>a</sup><br>$\pm 0.85$ | 5.98 <sup>ab</sup><br>$\pm 1.70$ | 0.61 <sup>a</sup><br>$\pm 0.14$        |
|                | SYNBIOTIC 1 | 13.72 <sup>bc</sup><br>$\pm 4.46$                   | 19.28 <sup>a</sup><br>$\pm 5.50$ | 66.21 <sup>b</sup><br>$\pm 6.13$  | 5.51 <sup>a</sup><br>$\pm 1.56$ | 6.77 <sup>ab</sup><br>$\pm 1.46$ | 0.83 <sup>a</sup><br>$\pm 0.29$        |
|                | SYNBIOTIC 2 | 16.62 <sup>b</sup><br>$\pm 1.04$                    | 17.92 <sup>a</sup><br>$\pm 2.19$ | 70.83 <sup>ab</sup><br>$\pm 3.14$ | 5.30 <sup>a</sup><br>$\pm 0.88$ | 5.95 <sup>ab</sup><br>$\pm 0.55$ | 0.89 <sup>a</sup><br>$\pm 0.15$        |
| SRBC-IMMUNIZED | CONTROL     | 8.05 <sup>a</sup><br>$\pm 2.09$                     | 17.44 <sup>a</sup><br>$\pm 3.92$ | 71.60 <sup>a</sup><br>$\pm 4.47$  | 4.79 <sup>a</sup><br>$\pm 1.33$ | 6.16 <sup>a</sup><br>$\pm 1.58$  | 0.82 <sup>a</sup><br>$\pm 0.27$        |
|                | PREBIOTIC 1 | 7.77 <sup>a</sup><br>$\pm 3.88$                     | 13.20 <sup>a</sup><br>$\pm 2.45$ | 71.47 <sup>a</sup><br>$\pm 5.24$  | 5.63 <sup>a</sup><br>$\pm 1.49$ | 7.23 <sup>a</sup><br>$\pm 1.81$  | 0.73 <sup>a</sup><br>$\pm 0.26$        |
|                | PREBIOTIC 2 | 12.29 <sup>ab</sup><br>$\pm 5.24$                   | 13.73 <sup>a</sup><br>$\pm 5.73$ | 74.45 <sup>a</sup><br>$\pm 8.65$  | 5.57 <sup>a</sup><br>$\pm 1.93$ | 6.24 <sup>a</sup><br>$\pm 1.74$  | 0.92 <sup>a</sup><br>$\pm 0.32$        |
|                | SYNBIOTIC 1 | 15.24 <sup>b</sup><br>$\pm 6.07$                    | 18.80 <sup>a</sup><br>$\pm 5.88$ | 67.27 <sup>a</sup><br>$\pm 7.71$  | 6.27 <sup>a</sup><br>$\pm 1.97$ | 7.65 <sup>a</sup><br>$\pm 1.61$  | 0.87 <sup>a</sup><br>$\pm 0.43$        |
|                | SYNBIOTIC 2 | 15.05 <sup>b</sup><br>$\pm 2.50$                    | 19.13 <sup>a</sup><br>$\pm 3.46$ | 68.16 <sup>a</sup><br>$\pm 6.59$  | 6.27 <sup>a</sup><br>$\pm 3.53$ | 6.46 <sup>a</sup><br>$\pm 1.31$  | 0.95 <sup>a</sup><br>$\pm 0.46$        |
| DEX-IMMUNIZED  | CONTROL     | 7.27 <sup>a</sup><br>$\pm 1.42$                     | 16.34 <sup>a</sup><br>$\pm 2.15$ | 73.45 <sup>a</sup><br>$\pm 2.65$  | 4.68 <sup>a</sup><br>$\pm 0.48$ | 5.52 <sup>a</sup><br>$\pm 1.05$  | 0.87 <sup>a</sup><br>$\pm 1.16$        |
|                | PREBIOTIC 1 | 7.09 <sup>a</sup><br>$\pm 2.66$                     | 16.02 <sup>a</sup><br>$\pm 4.55$ | 72.06 <sup>a</sup><br>$\pm 5.64$  | 5.00 <sup>a</sup><br>$\pm 0.71$ | 6.91 <sup>a</sup><br>$\pm 1.07$  | 0.74 <sup>a</sup><br>$\pm 0.15$        |
|                | PREBIOTIC 2 | 11.11 <sup>ab</sup><br>$\pm 4.65$                   | 16.34 <sup>a</sup><br>$\pm 6.36$ | 72.15 <sup>a</sup><br>$\pm 10.76$ | 4.84 <sup>a</sup><br>$\pm 2.68$ | 6.66 <sup>a</sup><br>$\pm 2.47$  | 0.75 <sup>a</sup><br>$\pm 0.34$        |
|                | SYNBIOTIC 1 | 14.32 <sup>b</sup><br>$\pm 4.97$                    | 20.55 <sup>a</sup><br>$\pm 3.27$ | 65.08 <sup>a</sup><br>$\pm 5.97$  | 7.23 <sup>a</sup><br>$\pm 2.68$ | 7.14 <sup>a</sup><br>$\pm 0.55$  | 1.02 <sup>a</sup><br>$\pm 0.36$        |
|                | SYNBIOTIC 2 | 16.51 <sup>b</sup><br>$\pm 3.07$                    | 20.98 <sup>a</sup><br>$\pm 6.98$ | 66.83 <sup>a</sup><br>$\pm 6.74$  | 5.97 <sup>a</sup><br>$\pm 4.43$ | 6.21 <sup>a</sup><br>$\pm 1.92$  | 0.90 <sup>a</sup><br>$\pm 0.41$        |

**Table S7.** The total count ( $\times 10^6$ ) of lymphocyte subsets in the thymus of 21-day-old chicken broilers after *in ovo* injection of the investigated prebiotics or synbiotics. The values are presented as mean  $\pm$  S.D.;  $n = 7$ . Data with different superscript letters show significant differences ( $p < 0.05$ ).

|                | Group       | CD3 <sup>+</sup><br>TCR $\gamma\delta$ <sup>+</sup> | CD4 <sup>+</sup> 8 <sup>+</sup>     | CD4 <sup>+</sup> 8 <sup>+</sup>       | CD4 <sup>+</sup>                    | CD8 <sup>+</sup>                    |
|----------------|-------------|-----------------------------------------------------|-------------------------------------|---------------------------------------|-------------------------------------|-------------------------------------|
| NON-IMMUNIZED  | CONTROL     | 127.21 <sup>a</sup><br>$\pm 43.65$                  | 297.59 <sup>a</sup><br>$\pm 123.31$ | 1239.10 <sup>a</sup><br>$\pm 500.14$  | 76.80 <sup>a</sup><br>$\pm 26.65$   | 95.13 <sup>a</sup><br>$\pm 47.65$   |
|                | PREBIOTIC 1 | 225.96 <sup>a</sup><br>$\pm 137.51$                 | 315.04 <sup>a</sup><br>$\pm 137.83$ | 1389.73 <sup>a</sup><br>$\pm 459.07$  | 111.91 <sup>a</sup><br>$\pm 38.47$  | 153.61 <sup>a</sup><br>$\pm 39.31$  |
|                | PREBIOTIC 2 | 218.96 <sup>a</sup><br>$\pm 86.08$                  | 285.65 <sup>a</sup><br>$\pm 103.13$ | 1782.45 <sup>a</sup><br>$\pm 580.33$  | 78.27 <sup>a</sup><br>$\pm 23.48$   | 133.67 <sup>a</sup><br>$\pm 41.33$  |
|                | SYNBIOTIC 1 | 264.68 <sup>a</sup><br>$\pm 100.16$                 | 370.32 <sup>a</sup><br>$\pm 48.97$  | 1341.80 <sup>a</sup><br>$\pm 381.34$  | 97.10 <sup>a</sup><br>$\pm 17.77$   | 136.38 <sup>a</sup><br>$\pm 40.38$  |
|                | SYNBIOTIC 2 | 339.87 <sup>a</sup><br>$\pm 46.08$                  | 370.45 <sup>a</sup><br>$\pm 38.74$  | 1504.10 <sup>a</sup><br>$\pm 367.56$  | 109.88 <sup>a</sup><br>$\pm 19.86$  | 125.20 <sup>a</sup><br>$\pm 27.45$  |
| SRBC-IMMUNIZED | CONTROL     | 129.03 <sup>a</sup><br>$\pm 44.72$                  | 279.84 <sup>a</sup><br>$\pm 90.17$  | 1137.07 <sup>a</sup><br>$\pm 237.14$  | 76.21 <sup>a</sup><br>$\pm 25.96$   | 101.74 <sup>a</sup><br>$\pm 44.00$  |
|                | PREBIOTIC 1 | 162.33 <sup>a</sup><br>$\pm 109.30$                 | 256.90 <sup>a</sup><br>$\pm 60.42$  | 1401.25 <sup>ab</sup><br>$\pm 278.59$ | 117.57 <sup>a</sup><br>$\pm 45.47$  | 143.76 <sup>a</sup><br>$\pm 49.47$  |
|                | PREBIOTIC 2 | 440.96 <sup>a</sup><br>$\pm 473.66$                 | 659.75 <sup>a</sup><br>$\pm 772.97$ | 2909.19 <sup>b</sup><br>$\pm 1960.89$ | 268.98 <sup>a</sup><br>$\pm 316.98$ | 250.01 <sup>a</sup><br>$\pm 191.42$ |
|                | SYNBIOTIC 1 | 325.07 <sup>a</sup><br>$\pm 109.53$                 | 425.14 <sup>a</sup><br>$\pm 60.62$  | 1632.15 <sup>ab</sup><br>$\pm 518.86$ | 145.02 <sup>a</sup><br>$\pm 40.37$  | 181.58 <sup>a</sup><br>$\pm 53.07$  |
|                | SYNBIOTIC 2 | 306.64 <sup>a</sup><br>$\pm 66.71$                  | 375.94 <sup>a</sup><br>$\pm 72.79$  | 1463.19 <sup>ab</sup><br>$\pm 493.49$ | 129.47 <sup>a</sup><br>$\pm 72.88$  | 133.83 <sup>a</sup><br>$\pm 37.31$  |
| DEX-IMMUNIZED  | CONTROL     | 112.35 <sup>a</sup><br>$\pm 29.23$                  | 252.77 <sup>a</sup><br>$\pm 68.87$  | 1121.58 <sup>a</sup><br>$\pm 174.92$  | 72.26 <sup>a</sup><br>$\pm 16.57$   | 85.37 <sup>a</sup><br>$\pm 22.39$   |
|                | PREBIOTIC 1 | 160.72 <sup>a</sup><br>$\pm 100.82$                 | 326.50 <sup>a</sup><br>$\pm 43.60$  | 1580.33 <sup>ab</sup><br>$\pm 517.11$ | 107.07 <sup>a</sup><br>$\pm 28.34$  | 146.66 <sup>ab</sup><br>$\pm 34.33$ |
|                | PREBIOTIC 2 | 439.49 <sup>a</sup><br>$\pm 563.14$                 | 710.78 <sup>a</sup><br>$\pm 753.90$ | 2773.70 <sup>b</sup><br>$\pm 1646.37$ | 219.21 <sup>a</sup><br>$\pm 267.26$ | 285.84 <sup>b</sup><br>$\pm 283.82$ |
|                | SYNBIOTIC 1 | 282.47 <sup>a</sup><br>$\pm 55.97$                  | 431.44 <sup>a</sup><br>$\pm 108.07$ | 1466.96 <sup>ab</sup><br>$\pm 636.29$ | 144.47 <sup>a</sup><br>$\pm 35.75$  | 155.56 <sup>ab</sup><br>$\pm 54.13$ |
|                | SYNBIOTIC 2 | 317.82 <sup>a</sup><br>$\pm 28.81$                  | 383.48 <sup>a</sup><br>$\pm 95.08$  | 1276.26 <sup>ab</sup><br>$\pm 389.07$ | 108.00 <sup>a</sup><br>$\pm 72.65$  | 115.24 <sup>ab</sup><br>$\pm 31.65$ |

**Table S8.** The percentage (%) of lymphocyte subsets in the thymus of 35-day-old chicken broilers after *in ovo* injection of the investigated prebiotics or synbiotics. The values are presented as mean  $\pm$  S.D.;  $n = 7$ . Data with different superscript letters show significant differences ( $p < 0.05$ ).

|                | Group       | CD3 <sup>+</sup><br>TCR $\gamma\delta$ <sup>+</sup> | CD4 <sup>+</sup>                  | CD4 <sup>+</sup> 8 <sup>+</sup>   | CD4 <sup>+</sup>                 | CD8 <sup>+</sup>                 | CD4 <sup>+</sup> /<br>CD8 <sup>+</sup> |
|----------------|-------------|-----------------------------------------------------|-----------------------------------|-----------------------------------|----------------------------------|----------------------------------|----------------------------------------|
| NON-IMMUNIZED  | CONTROL     | 9.41 <sup>a</sup><br>$\pm 3.96$                     | 17.06 <sup>a</sup><br>$\pm 4.12$  | 71.17 <sup>a</sup><br>$\pm 4.42$  | 5.05 <sup>a</sup><br>$\pm 0.95$  | 6.72 <sup>a</sup><br>$\pm 1.12$  | 0.78 <sup>ab</sup><br>$\pm 0.22$       |
|                | PREBIOTIC 1 | 6.64 <sup>a</sup><br>$\pm 0.64$                     | 12.00 <sup>b</sup><br>$\pm 1.30$  | 78.08 <sup>b</sup><br>$\pm 2.76$  | 5.10 <sup>a</sup><br>$\pm .19$   | 4.81 <sup>bc</sup><br>$\pm 0.93$ | 1.09 <sup>a</sup><br>$\pm 0.31$        |
|                | PREBIOTIC 2 | 5.93 <sup>a</sup><br>$\pm 2.02$                     | 17.63 <sup>a</sup><br>$\pm 3.31$  | 73.49 <sup>ab</sup><br>$\pm 2.84$ | 4.34 <sup>a</sup><br>$\pm 1.08$  | 4.54 <sup>b</sup><br>$\pm 1.04$  | 0.95 <sup>ac</sup><br>$\pm 0.06$       |
|                | SYNBIOTIC 1 | 10.94 <sup>a</sup><br>$\pm 4.21$                    | 16.34 <sup>ab</sup><br>$\pm 1.80$ | 72.67 <sup>ab</sup><br>$\pm 2.56$ | 3.77 <sup>a</sup><br>$\pm 1.13$  | 7.22 <sup>ac</sup><br>$\pm 0.76$ | 0.52 <sup>b</sup><br>$\pm 0.15$        |
|                | SYNBIOTIC 2 | 10.01 <sup>a</sup><br>$\pm 4.48$                    | 14.17 <sup>ab</sup><br>$\pm 3.66$ | 75.66 <sup>ab</sup><br>$\pm 5.66$ | 4.21 <sup>a</sup><br>$\pm 1.08$  | 5.97 <sup>ab</sup><br>$\pm 1.68$ | 0.73 <sup>bc</sup><br>$\pm 0.16$       |
| SRBC-IMMUNIZED | CONTROL     | 7.85 <sup>ab</sup><br>$\pm 1.31$                    | 21.15 <sup>a</sup><br>$\pm 4.93$  | 66.78 <sup>a</sup><br>$\pm 4.98$  | 5.64 <sup>a</sup><br>$\pm 1.29$  | 6.44 <sup>a</sup><br>$\pm 0.71$  | 0.90 <sup>a</sup><br>$\pm 0.27$        |
|                | PREBIOTIC 1 | 6.12 <sup>a</sup><br>$\pm 1.41$                     | 10.37 <sup>b</sup><br>$\pm 2.16$  | 81.14 <sup>b</sup><br>$\pm 2.63$  | 3.44 <sup>a</sup><br>$\pm 0.69$  | 5.04 <sup>a</sup><br>$\pm 1.12$  | 0.73 <sup>a</sup><br>$\pm 0.31$        |
|                | PREBIOTIC 2 | 6.85 <sup>ab</sup><br>$\pm 0.80$                    | 18.25 <sup>a</sup><br>$\pm 5.57$  | 71.49 <sup>a</sup><br>$\pm 7.22$  | 4.55 <sup>a</sup><br>$\pm 1.41$  | 5.38 <sup>a</sup><br>$\pm 1.78$  | 0.89 <sup>a</sup><br>$\pm 0.25$        |
|                | SYNBIOTIC 1 | 11.19 <sup>bc</sup><br>$\pm 4.84$                   | 16.10 <sup>ab</sup><br>$\pm 4.88$ | 71.86 <sup>a</sup><br>$\pm 7.13$  | 5.39 <sup>a</sup><br>$\pm 2.32$  | 6.64 <sup>a</sup><br>$\pm 1.34$  | 0.80 <sup>a</sup><br>$\pm 0.30$        |
|                | SYNBIOTIC 2 | 12.32 <sup>c</sup><br>$\pm 3.59$                    | 17.77 <sup>a</sup><br>$\pm 3.40$  | 70.38 <sup>a</sup><br>$\pm 3.63$  | 4.88 <sup>a</sup><br>$\pm 0.79$  | 6.98 <sup>a</sup><br>$\pm 1.12$  | 0.71 <sup>a</sup><br>$\pm 0.15$        |
| DEX-IMMUNIZED  | CONTROL     | 8.11 <sup>ab</sup><br>$\pm 1.31$                    | 18.22 <sup>a</sup><br>$\pm 2.75$  | 70.69 <sup>a</sup><br>$\pm 2.55$  | 4.79 <sup>ab</sup><br>$\pm 1.13$ | 6.30 <sup>ab</sup><br>$\pm 1.30$ | 0.77 <sup>a</sup><br>$\pm 0.15$        |
|                | PREBIOTIC 1 | 8.56 <sup>ab</sup><br>$\pm 2.92$                    | 14.75 <sup>a</sup><br>$\pm 7.16$  | 76.71 <sup>a</sup><br>$\pm 8.62$  | 3.74 <sup>ab</sup><br>$\pm 0.77$ | 4.78 <sup>ab</sup><br>$\pm 1.08$ | 0.81 <sup>a</sup><br>$\pm 0.20$        |
|                | PREBIOTIC 2 | 6.76 <sup>a</sup><br>$\pm 1.32$                     | 20.14 <sup>a</sup><br>$\pm 4.55$  | 71.71 <sup>a</sup><br>$\pm 5.37$  | 3.64 <sup>a</sup><br>$\pm 0.52$  | 4.52 <sup>a</sup><br>$\pm 1.02$  | 0.83 <sup>a</sup><br>$\pm 0.19$        |
|                | SYNBIOTIC 1 | 7.45 <sup>a</sup><br>$\pm 2.43$                     | 16.40 <sup>a</sup><br>$\pm 2.20$  | 75.22 <sup>a</sup><br>$\pm 2.60$  | 3.58 <sup>a</sup><br>$\pm 1.02$  | 4.80 <sup>ab</sup><br>$\pm 1.30$ | 0.83 <sup>a</sup><br>$\pm 0.44$        |
|                | SYNBIOTIC 2 | 11.53 <sup>b</sup><br>$\pm 3.69$                    | 16.92 <sup>a</sup><br>$\pm 5.22$  | 70.93 <sup>a</sup><br>$\pm 6.62$  | 5.22 <sup>b</sup><br>$\pm 0.31$  | 6.91 <sup>b</sup><br>$\pm 1.36$  | 0.78 <sup>a</sup><br>$\pm 0.15$        |

**Table S9.** The total count ( $\times 10^6$ ) of lymphocyte subsets in the thymus of 35-day-old chicken broilers after *in ovo* injection of the investigated prebiotics or synbiotics. The values are presented as mean  $\pm$  S.D.;  $n = 7$ . Data with different superscript letters show significant differences ( $p < 0.05$ ).

|                | Group       | CD3 <sup>+</sup><br>TCR $\gamma\delta$ <sup>+</sup> | CD4 <sup>+</sup>                      | CD4 <sup>+</sup> 8 <sup>+</sup>        | CD4 <sup>+</sup>                    | CD8 <sup>+</sup>                    |
|----------------|-------------|-----------------------------------------------------|---------------------------------------|----------------------------------------|-------------------------------------|-------------------------------------|
| NON-IMMUNIZED  | CONTROL     | 351.05 <sup>a</sup><br>$\pm 116.60$                 | 678.13 <sup>a</sup><br>$\pm 302.00$   | 2801.07 <sup>a</sup><br>$\pm 868.32$   | 200.42 <sup>a</sup><br>$\pm 80.83$  | 268.87 <sup>a</sup><br>$\pm 98.33$  |
|                | PREBIOTIC 1 | 464.72 <sup>a</sup><br>$\pm 157.71$                 | 851.26 <sup>a</sup><br>$\pm 325.65$   | 5480.81 <sup>a</sup><br>$\pm 1731.16$  | 370.91 <sup>a</sup><br>$\pm 177.56$ | 331.19 <sup>a</sup><br>$\pm 118.20$ |
|                | PREBIOTIC 2 | 427.98 <sup>a</sup><br>$\pm 223.00$                 | 1177.41 <sup>a</sup><br>$\pm 451.11$  | 4856.52 <sup>a</sup><br>$\pm 1545.93$  | 292.19 <sup>a</sup><br>$\pm 136.62$ | 300.66 <sup>a</sup><br>$\pm 124.08$ |
|                | SYNBIOTIC 1 | 517.23 <sup>a</sup><br>$\pm 201.25$                 | 874.13 <sup>a</sup><br>$\pm 334.87$   | 4055.60 <sup>a</sup><br>$\pm 1972.60$  | 219.01 <sup>a</sup><br>$\pm 152.28$ | 391.26 <sup>a</sup><br>$\pm 173.06$ |
|                | SYNBIOTIC 2 | 412.05 <sup>a</sup><br>$\pm 199.99$                 | 630.79 <sup>a</sup><br>$\pm 303.70$   | 3242.42 <sup>a</sup><br>$\pm 844.35$   | 183.28 <sup>a</sup><br>$\pm 75.54$  | 257.19 <sup>a</sup><br>$\pm 106.30$ |
| SRBC-IMMUNIZED | CONTROL     | 384.57 <sup>a</sup><br>$\pm 228.29$                 | 1007.61 <sup>a</sup><br>$\pm 637.92$  | 3114.08 <sup>a</sup><br>$\pm 1480.70$  | 259.76 <sup>a</sup><br>$\pm 137.28$ | 298.49 <sup>a</sup><br>$\pm 150.11$ |
|                | PREBIOTIC 1 | 489.31 <sup>a</sup><br>$\pm 175.85$                 | 844.66 <sup>a</sup><br>$\pm 326.36$   | 7077.35 <sup>a</sup><br>$\pm 3649.37$  | 296.07 <sup>a</sup><br>$\pm 145.33$ | 410.44 <sup>a</sup><br>$\pm 172.46$ |
|                | PREBIOTIC 2 | 462.15 <sup>a</sup><br>$\pm 163.89$                 | 1255.81 <sup>a</sup><br>$\pm 646.71$  | 4817.20 <sup>a</sup><br>$\pm 1609.86$  | 302.56 <sup>a</sup><br>$\pm 125.02$ | 359.16 <sup>a</sup><br>$\pm 161.47$ |
|                | SYNBIOTIC 1 | 851.14 <sup>a</sup><br>$\pm 587.07$                 | 1272.22 <sup>a</sup><br>$\pm 1038.57$ | 4902.02 <sup>a</sup><br>$\pm 2379.67$  | 406.65 <sup>a</sup><br>$\pm 323.49$ | 472.53 <sup>a</sup><br>$\pm 291.75$ |
|                | SYNBIOTIC 2 | 623.41 <sup>a</sup><br>$\pm 273.37$                 | 916.14 <sup>a</sup><br>$\pm 370.69$   | 3526.22 <sup>a</sup><br>$\pm 1016.67$  | 256.20 <sup>a</sup><br>$\pm 114.30$ | 354.87 <sup>a</sup><br>$\pm 133.17$ |
| DEX-IMMUNIZED  | CONTROL     | 284.23 <sup>a</sup><br>$\pm 96.87$                  | 674.28 <sup>a</sup><br>$\pm 199.30$   | 2605.39 <sup>a</sup><br>$\pm 544.96$   | 173.98 <sup>a</sup><br>$\pm 41.51$  | 226.48 <sup>a</sup><br>$\pm 41.71$  |
|                | PREBIOTIC 1 | 856.77 <sup>b</sup><br>$\pm 758.22$                 | 1339.95 <sup>a</sup><br>$\pm 887.93$  | 6833.19 <sup>b</sup><br>$\pm 3979.88$  | 346.93 <sup>a</sup><br>$\pm 231.63$ | 422.66 <sup>a</sup><br>$\pm 243.16$ |
|                | PREBIOTIC 2 | 417.85 <sup>ab</sup><br>$\pm 104.73$                | 1341.32 <sup>a</sup><br>$\pm 313.30$  | 4943.33 <sup>ab</sup><br>$\pm 1552.18$ | 247.50 <sup>a</sup><br>$\pm 67.69$  | 295.03 <sup>a</sup><br>$\pm 26.68$  |
|                | SYNBIOTIC 1 | 423.72 <sup>ab</sup><br>$\pm 180.76$                | 914.68 <sup>a</sup><br>$\pm 186.86$   | 4259.68 <sup>ab</sup><br>$\pm 1127.00$ | 205.48 <sup>a</sup><br>$\pm 89.50$  | 260.16 <sup>a</sup><br>$\pm 58.99$  |
|                | SYNBIOTIC 2 | 677.92 <sup>ab</sup><br>$\pm 290.07$                | 1076.67 <sup>a</sup><br>$\pm 551.37$  | 4485.92 <sup>ab</sup><br>$\pm 1639.59$ | 335.15 <sup>a</sup><br>$\pm 137.23$ | 445.76 <sup>a</sup><br>$\pm 223.72$ |

**Table S10.** The percentage (%) of lymphocyte subsets in the spleen of 7-day-old chicken broilers after *in ovo* injection of the investigated prebiotics or synbiotics. The values are presented as mean  $\pm$  S.D.;  $n = 7$ . Data with different superscript letters show significant differences ( $p < 0.05$ ).

| Group       | Bu-1 <sup>+</sup>                 | CD3 <sup>+</sup>                 | CD3 <sup>+</sup><br>TCR $\gamma\delta$ <sup>+</sup> | CD3 <sup>+</sup><br>CD4 <sup>+</sup> | CD3 <sup>+</sup><br>CD8 <sup>+</sup> | CD4 <sup>+</sup> /<br>CD8 <sup>+</sup> |
|-------------|-----------------------------------|----------------------------------|-----------------------------------------------------|--------------------------------------|--------------------------------------|----------------------------------------|
| CONTROL     | 10.41 <sup>ab</sup><br>$\pm 4.99$ | 79.79 <sup>a</sup><br>$\pm 3.52$ | 8.24 <sup>ab</sup><br>$\pm 1.49$                    | 31.89 <sup>a</sup><br>$\pm 7.99$     | 44.94 <sup>a</sup><br>$\pm 4.02$     | 0.73 <sup>a</sup><br>$\pm 0.24$        |
| PREBIOTIC 1 | 9.44 <sup>a</sup><br>$\pm 2.32$   | 75.05 <sup>a</sup><br>$\pm 4.01$ | 9.57 <sup>ab</sup> $\pm 2.05$                       | 25.71 <sup>ab</sup><br>$\pm 5.57$    | 45.36 <sup>a</sup><br>$\pm 4.65$     | 0.58 <sup>a</sup><br>$\pm 1.19$        |
| PREBIOTIC 2 | 16.66 <sup>ab</sup><br>$\pm 6.96$ | 64.94 <sup>b</sup><br>$\pm 7.69$ | 10.24 <sup>a</sup><br>$\pm 1.79$                    | 23.99 <sup>ab</sup><br>$\pm 4.38$    | 39.03 <sup>a</sup><br>$\pm 6.30$     | 0.62 <sup>a</sup><br>$\pm 0.12$        |
| SYNBIOTIC 1 | 18.74 <sup>b</sup><br>$\pm 7.86$  | 59.63 <sup>b</sup><br>$\pm 6.35$ | 6.84 <sup>b</sup><br>$\pm 1.91$                     | 22.32 <sup>b</sup><br>$\pm 3.10$     | 38.37 <sup>a</sup><br>$\pm 9.87$     | 0.64 <sup>a</sup><br>$\pm 0.26$        |
| SYNBIOTIC 2 | 14.62 <sup>ab</sup><br>$\pm 2.29$ | 65.99 <sup>b</sup><br>$\pm 3.34$ | 8.02 <sup>ab</sup><br>$\pm 1.70$                    | 27.52 <sup>ab</sup><br>$\pm 4.98$    | 37.66 <sup>a</sup><br>$\pm 5.09$     | 0.75 <sup>a</sup><br>$\pm 0.24$        |

**Table S11.** The total count ( $\times 10^6$ ) of lymphocyte subsets in the spleen of 7-day-old chicken broilers after *in ovo* injection of the investigated prebiotics or synbiotics. The values are presented as mean  $\pm$  S.D.;  $n = 7$ . Data with different superscript letters show significant differences ( $p < 0.05$ ).

| Group       | CD4 <sup>+</sup> 8 <sup>+</sup>   | CD3 <sup>+</sup>                   | CD3 <sup>+</sup><br>TCR $\gamma\delta$ <sup>+</sup> | CD3 <sup>+</sup><br>CD4 <sup>+</sup> | CD3 <sup>+</sup><br>CD8 <sup>+</sup> |
|-------------|-----------------------------------|------------------------------------|-----------------------------------------------------|--------------------------------------|--------------------------------------|
| CONTROL     | 18.28 <sup>a</sup><br>$\pm 10.27$ | 134.89 <sup>a</sup><br>$\pm 26.33$ | 13.85 <sup>a</sup><br>$\pm 3.39$                    | 54.94 <sup>a</sup><br>$\pm 21.03$    | 75.70 <sup>a</sup><br>$\pm 14.80$    |
| PREBIOTIC 1 | 10.74 <sup>a</sup><br>$\pm 3.27$  | 84.87 <sup>b</sup><br>$\pm 14.26$  | 11.02 <sup>a</sup><br>$\pm 3.67$                    | 29.46 <sup>b</sup><br>$\pm 9.64$     | 50.93 <sup>b</sup><br>$\pm 7.42$     |
| PREBIOTIC 2 | 21.48 <sup>a</sup><br>$\pm 10.26$ | 80.95 <sup>b</sup><br>$\pm 11.90$  | 12.86 <sup>a</sup><br>$\pm 3.00$                    | 29.67 <sup>b</sup><br>$\pm 4.33$     | 48.83 <sup>b</sup><br>$\pm 10.38$    |
| SYNBIOTIC 1 | 21.82 <sup>a</sup><br>$\pm 8.52$  | 70.41 <sup>b</sup><br>$\pm 10.48$  | 8.10 <sup>a</sup><br>$\pm 2.56$                     | 26.13 <sup>b</sup><br>$\pm 3.03$     | 45.58 <sup>b</sup><br>$\pm 13.17$    |
| SYNBIOTIC 2 | 20.53 <sup>a</sup><br>$\pm 7.67$  | 93.84 <sup>b</sup><br>$\pm 33.38$  | 11.82 <sup>a</sup><br>$\pm 5.42$                    | 37.63 <sup>a</sup><br>$\pm 11.68$    | 55.17 <sup>a</sup><br>$\pm 23.08$    |

**Table S12.** The percentage (%) of lymphocyte subsets in the spleen of 21-day-old chicken broilers after *in ovo* injection of the investigated prebiotics or synbiotics. The values are presented as mean  $\pm$  S.D.;  $n = 7$ . Data with different superscript letters show significant differences ( $p < 0.05$ ).

|                | Group       | Bu-1 <sup>+</sup>                 | CD3 <sup>+</sup>                  | CD3 <sup>+</sup><br>TCR $\gamma\delta$ <sup>+</sup> | CD3 <sup>+</sup><br>CD4 <sup>+</sup> | CD3 <sup>+</sup><br>CD8 <sup>+</sup> | CD4 <sup>+</sup> /<br>CD8 <sup>+</sup> |
|----------------|-------------|-----------------------------------|-----------------------------------|-----------------------------------------------------|--------------------------------------|--------------------------------------|----------------------------------------|
| NON-IMMUNIZED  | CONTROL     | 17.07 <sup>a</sup><br>$\pm 5.12$  | 72.58 <sup>a</sup><br>$\pm 6.77$  | 13.97 <sup>ab</sup><br>$\pm 2.57$                   | 25.02 <sup>a</sup><br>$\pm 4.13$     | 42.99 <sup>ab</sup><br>$\pm 6.57$    | 0.59 <sup>a</sup><br>$\pm 0.08$        |
|                | PREBIOTIC 1 | 23.66 <sup>b</sup><br>$\pm 3.54$  | 61.13 <sup>b</sup><br>$\pm 7.87$  | 11.41 <sup>a</sup><br>$\pm 2.94$                    | 26.27 <sup>a</sup><br>$\pm 4.56$     | 37.81 <sup>ac</sup><br>$\pm 2.59$    | 0.70 <sup>a</sup><br>$\pm 0.14$        |
|                | PREBIOTIC 2 | 21.25 <sup>ab</sup><br>$\pm 3.84$ | 67.39 <sup>ab</sup><br>$\pm 4.77$ | 14.06 <sup>ab</sup><br>$\pm 2.26$                   | 24.58 <sup>a</sup><br>$\pm 2.54$     | 44.53 <sup>b</sup><br>$\pm 3.27$     | 0.55 <sup>a</sup><br>$\pm 0.08$        |
|                | SYNBIOTIC 1 | 16.59 <sup>ab</sup><br>$\pm 0.80$ | 74.88 <sup>a</sup><br>$\pm 2.57$  | 16.98 <sup>b</sup><br>$\pm 2.28$                    | 30.87 <sup>a</sup><br>$\pm 3.07$     | 34.07 <sup>c</sup><br>$\pm 1.58$     | 0.90 <sup>a</sup><br>$\pm 0.07$        |
|                | SYNBIOTIC 2 | 20.85 <sup>ab</sup><br>$\pm 4.88$ | 63.96 <sup>ab</sup><br>$\pm 7.28$ | 15.40 <sup>ab</sup><br>$\pm 2.11$                   | 24.46 <sup>a</sup><br>$\pm 11.79$    | 34.13 <sup>c</sup><br>$\pm 4.61$     | 0.74 <sup>a</sup><br>$\pm 0.41$        |
| SRBC-IMMUNIZED | CONTROL     | 24.06 <sup>a</sup><br>$\pm 5.88$  | 63.43 <sup>a</sup><br>$\pm 7.44$  | 13.70 <sup>a</sup><br>$\pm 2.51$                    | 20.99 <sup>a</sup><br>$\pm 3.47$     | 38.65 <sup>a</sup><br>$\pm 8.62$     | 0.56 <sup>a</sup><br>$\pm 0.15$        |
|                | PREBIOTIC 1 | 19.93 <sup>a</sup><br>$\pm 2.07$  | 65.03 <sup>a</sup><br>$\pm 7.57$  | 11.83 <sup>a</sup><br>$\pm 1.87$                    | 26.22 <sup>a</sup><br>$\pm 4.22$     | 37.08 <sup>a</sup><br>$\pm 4.33$     | 0.71 <sup>a</sup><br>$\pm 0.16$        |
|                | PREBIOTIC 2 | 20.86 <sup>a</sup><br>$\pm 5.34$  | 65.55 <sup>a</sup><br>$\pm 8.92$  | 12.59 <sup>a</sup><br>$\pm 2.59$                    | 25.76 <sup>a</sup><br>$\pm 7.24$     | 39.45 <sup>a</sup><br>$\pm 6.23$     | 0.67 <sup>a</sup><br>$\pm 0.23$        |
|                | SYNBIOTIC 1 | 14.87 <sup>a</sup><br>$\pm 1.20$  | 75.46 <sup>a</sup><br>$\pm 1.68$  | 14.35 <sup>a</sup><br>$\pm 4.28$                    | 32.30 <sup>a</sup><br>$\pm 7.97$     | 38.31 <sup>a</sup><br>$\pm 9.08$     | 0.90 <sup>a</sup><br>$\pm 0.39$        |
|                | SYNBIOTIC 2 | 22.92 <sup>a</sup><br>$\pm 5.60$  | 65.92 <sup>a</sup><br>$\pm 5.17$  | 13.14 <sup>a</sup><br>$\pm 3.46$                    | 24.04 <sup>a</sup><br>$\pm 7.44$     | 38.18 <sup>a</sup><br>$\pm 4.53$     | 0.66 <sup>a</sup><br>$\pm 0.13$        |
| DEX-IMMUNIZED  | CONTROL     | 23.70 <sup>a</sup><br>$\pm 7.90$  | 62.78 <sup>a</sup><br>$\pm 10.30$ | 10.16 <sup>a</sup><br>$\pm 1.17$                    | 20.07 <sup>a</sup><br>$\pm 6.06$     | 38.52 <sup>a</sup><br>$\pm 13.28$    | 0.62 <sup>a</sup><br>$\pm 0.29$        |
|                | PREBIOTIC 1 | 17.39 <sup>a</sup><br>$\pm 4.53$  | 64.98 <sup>a</sup><br>$\pm 6.00$  | 11.64 <sup>a</sup><br>$\pm 2.84$                    | 23.54 <sup>a</sup><br>$\pm 3.73$     | 39.88 <sup>a</sup><br>$\pm 6.33$     | 0.60 <sup>a</sup><br>$\pm 0.14$        |
|                | PREBIOTIC 2 | 18.04 <sup>a</sup><br>$\pm 4.21$  | 71.53 <sup>a</sup><br>$\pm 5.84$  | 13.31 <sup>ab</sup><br>$\pm 3.75$                   | 24.36 <sup>a</sup><br>$\pm 2.35$     | 43.43 <sup>a</sup><br>$\pm 6.24$     | 0.58 <sup>a</sup><br>$\pm 0.07$        |
|                | SYNBIOTIC 1 | 21.94 <sup>a</sup><br>$\pm 7.17$  | 62.97 <sup>a</sup><br>$\pm 6.95$  | 17.92 <sup>b</sup><br>$\pm 2.28$                    | 25.89 <sup>a</sup><br>$\pm 2.30$     | 39.64 <sup>a</sup><br>$\pm 5.82$     | 0.66 <sup>a</sup><br>$\pm 0.06$        |
|                | SYNBIOTIC 2 | 21.21 <sup>a</sup><br>$\pm 5.79$  | 62.16 <sup>a</sup><br>$\pm 7.19$  | 10.56 <sup>a</sup><br>$\pm 2.65$                    | 24.24 <sup>a</sup><br>$\pm 4.97$     | 38.16 <sup>a</sup><br>$\pm 6.24$     | 0.66 <sup>a</sup><br>$\pm 0.22$        |

**Table S13.** The total count ( $\times 10^6$ ) of lymphocyte subsets in the spleen of 21-day-old chicken broilers after *in ovo* injection of the investigated prebiotics or synbiotics. The values are presented as mean  $\pm$  S.D.;  $n = 7$ . Data with different superscript letters show significant differences ( $p < 0.05$ ).

|                | Group       | Bu-1 <sup>+</sup>                   | CD3 <sup>+</sup>                    | CD3 <sup>+</sup><br>TCR $\gamma\delta$ <sup>+</sup> | CD3 <sup>+</sup><br>CD4 <sup>+</sup> | CD3 <sup>+</sup><br>CD8 <sup>+</sup> |
|----------------|-------------|-------------------------------------|-------------------------------------|-----------------------------------------------------|--------------------------------------|--------------------------------------|
| NON-IMMUNIZED  | CONTROL     | 92.58 <sup>a</sup><br>$\pm 55.05$   | 367.40 <sup>a</sup><br>$\pm 105.12$ | 72.18 <sup>a</sup><br>$\pm 30.99$                   | 131.42 <sup>a</sup><br>$\pm 39.75$   | 214.49 <sup>a</sup><br>$\pm 49.97$   |
|                | PREBIOTIC 1 | 156.31 <sup>a</sup><br>$\pm 47.65$  | 405.62 <sup>a</sup><br>$\pm 133.83$ | 70.84 <sup>a</sup><br>$\pm 9.71$                    | 169.46 <sup>a</sup><br>$\pm 41.80$   | 250.28 <sup>ab</sup><br>$\pm 76.75$  |
|                | PREBIOTIC 2 | 175.15 <sup>a</sup><br>$\pm 46.12$  | 553.45 <sup>a</sup><br>$\pm 87.97$  | 116.06 <sup>ab</sup><br>$\pm 28.05$                 | 202.45 <sup>a</sup><br>$\pm 39.14$   | 368.21 <sup>b</sup><br>$\pm 74.11$   |
|                | SYNBIOTIC 1 | 142.62 <sup>a</sup><br>$\pm 16.76$  | 644.04 <sup>a</sup><br>$\pm 76.41$  | 156.88 <sup>b</sup><br>$\pm 25.04$                  | 266.30 <sup>a</sup><br>$\pm 46.152$  | 293.09 <sup>ab</sup><br>$\pm 36.86$  |
|                | SYNBIOTIC 2 | 160.06 <sup>a</sup><br>$\pm 25.98$  | 502.44 <sup>a</sup><br>$\pm 104.43$ | 120.48 <sup>ab</sup><br>$\pm 25.12$                 | 193.50 <sup>a</sup><br>$\pm 107.25$  | 260.70 <sup>ab</sup><br>$\pm 50.92$  |
| SRBC-IMMUNIZED | CONTROL     | 175.81 <sup>a</sup><br>$\pm 74.57$  | 451.40 <sup>a</sup><br>$\pm 136.91$ | 96.93 <sup>a</sup><br>$\pm 29.94$                   | 146.61 <sup>a</sup><br>$\pm 36.59$   | 271.90 <sup>a</sup><br>$\pm 76.25$   |
|                | PREBIOTIC 1 | 138.46 <sup>a</sup><br>$\pm 21.30$  | 455.33 <sup>a</sup><br>$\pm 91.12$  | 81.73 <sup>a</sup><br>$\pm 12.24$                   | 181.29 <sup>a</sup><br>$\pm 43.22$   | 259.46 <sup>a</sup><br>$\pm 53.57$   |
|                | PREBIOTIC 2 | 179.27 <sup>a</sup><br>$\pm 89.77$  | 535.81 <sup>a</sup><br>$\pm 138.50$ | 105.64 <sup>a</sup><br>$\pm 42.31$                  | 210.70 <sup>a</sup><br>$\pm 69.78$   | 320.71 <sup>a</sup><br>$\pm 73.46$   |
|                | SYNBIOTIC 1 | 113.58 <sup>a</sup><br>$\pm 13.59$  | 579.21 <sup>a</sup><br>$\pm 58.48$  | 108.18 <sup>a</sup><br>$\pm 31.68$                  | 250.81 <sup>a</sup><br>$\pm 78.28$   | 290.01 <sup>a</sup><br>$\pm 44.09$   |
|                | SYNBIOTIC 2 | 185.36 <sup>a</sup><br>$\pm 59.01$  | 535.36 <sup>a</sup><br>$\pm 105.34$ | 109.61 <sup>a</sup><br>$\pm 41.37$                  | 203.60 <sup>a</sup><br>$\pm 91.23$   | 316.49 <sup>a</sup><br>$\pm 73.25$   |
| DEX-IMMUNIZED  | CONTROL     | 140.64 <sup>a</sup><br>$\pm 58.29$  | 378.35 <sup>a</sup><br>$\pm 108.56$ | 61.32 <sup>a</sup><br>$\pm 17.11$                   | 119.84 <sup>a</sup><br>$\pm 47.36$   | 232.27 <sup>a</sup><br>$\pm 106.27$  |
|                | PREBIOTIC 1 | 179.38 <sup>a</sup><br>$\pm 64.55$  | 686.61 <sup>a</sup><br>$\pm 228.82$ | 122.94 <sup>b</sup><br>$\pm 44.48$                  | 234.04 <sup>a</sup><br>$\pm 112.29$  | 371.86 <sup>ab</sup><br>$\pm 120.75$ |
|                | PREBIOTIC 2 | 154.65 <sup>a</sup><br>$\pm 26.32$  | 652.17 <sup>a</sup><br>$\pm 258.42$ | 116.85 <sup>ab</sup><br>$\pm 36.71$                 | 219.48 <sup>a</sup><br>$\pm 74.19$   | 399.18 <sup>b</sup><br>$\pm 99.69$   |
|                | SYNBIOTIC 1 | 197.80 <sup>a</sup><br>$\pm 100.15$ | 536.78 <sup>a</sup><br>$\pm 105.70$ | 147.44 <sup>b</sup><br>$\pm 42.98$                  | 216.64 <sup>a</sup><br>$\pm 60.99$   | 325.47 <sup>ab</sup><br>$\pm 69.58$  |
|                | SYNBIOTIC 2 | 150.54 <sup>a</sup><br>$\pm 35.58$  | 449.62 <sup>a</sup><br>$\pm 93.72$  | 77.68 <sup>ab</sup><br>$\pm 31.30$                  | 172.29 <sup>a</sup><br>$\pm 49.80$   | 274.09 <sup>ab</sup><br>$\pm 79.69$  |

**Table S14.** The percentage (%) of lymphocyte subsets in the spleen of 35-day-old chicken broilers after *in ovo* injection of the investigated prebiotics or synbiotics. The values are presented as mean  $\pm$  S.D.;  $n = 7$ . Data with different superscript letters show significant differences ( $p < 0.05$ ).

|                | Group.      | Bu-1 <sup>+</sup>                 | CD3 <sup>+</sup>                   | CD3 <sup>+</sup><br>TCR $\gamma\delta$ <sup>+</sup> | CD3 <sup>+</sup><br>CD4 <sup>+</sup> | CD3 <sup>+</sup><br>CD8 <sup>+</sup> | CD4 <sup>+</sup> /<br>CD8 <sup>+</sup> |
|----------------|-------------|-----------------------------------|------------------------------------|-----------------------------------------------------|--------------------------------------|--------------------------------------|----------------------------------------|
| NON-IMMUNIZED  | CONTROL     | 20.17 <sup>a</sup><br>$\pm 5.89$  | 73.25 <sup>a</sup><br>$\pm 6.81$   | 12.84 <sup>a</sup><br>$\pm 2.69$                    | 24.93 <sup>a</sup><br>$\pm 2.32$     | 46.61 <sup>a</sup><br>$\pm 4.77$     | 0.54 <sup>a</sup><br>$\pm 0.07$        |
|                | PREBIOTIC 1 | 36.72 <sup>b</sup><br>$\pm 10.95$ | 53.54 <sup>b</sup><br>$\pm 12.12$  | 14.73 <sup>ab</sup><br>$\pm 3.30$                   | 20.83 <sup>a</sup><br>$\pm 6.59$     | 29.84 <sup>b</sup><br>$\pm 7.98$     | 0.72 <sup>ab</sup><br>$\pm 0.18$       |
|                | PREBIOTIC 2 | 19.32 <sup>a</sup><br>$\pm 7.50$  | 70.10 <sup>ac</sup><br>$\pm 11.88$ | 15.01 <sup>ab</sup><br>$\pm 2.55$                   | 28.99 <sup>a</sup><br>$\pm 4.25$     | 35.14 <sup>bc</sup><br>$\pm 7.10$    | 0.84 <sup>b</sup><br>$\pm 0.14$        |
|                | SYNBIOTIC 1 | 24.68 <sup>a</sup><br>$\pm 4.45$  | 55.60 <sup>bc</sup><br>$\pm 13.31$ | 15.52 <sup>ab</sup><br>$\pm 3.29$                   | 21.49 <sup>a</sup><br>$\pm 6.79$     | 34.02 <sup>bc</sup><br>$\pm 7.96$    | 0.60 <sup>ab</sup><br>$\pm 0.11$       |
|                | SYNBIOTIC 2 | 18.36 <sup>a</sup><br>$\pm 4.06$  | 72.53 <sup>a</sup><br>$\pm 5.15$   | 21.36 <sup>b</sup><br>$\pm 8.00$                    | 30.05 <sup>a</sup><br>$\pm 8.31$     | 41.40 <sup>ac</sup><br>$\pm 6.54$    | 0.74 <sup>ab</sup><br>$\pm 0.27$       |
| SRBC-IMMUNIZED | CONTROL     | 19.56 <sup>a</sup><br>$\pm 3.43$  | 73.60 <sup>a</sup><br>$\pm 4.96$   | 13.85 <sup>a</sup><br>$\pm 1.67$                    | 25.56 <sup>a</sup><br>$\pm 3.56$     | 40.89 <sup>a</sup><br>$\pm 5.28$     | 0.63 <sup>ab</sup><br>$\pm 0.09$       |
|                | PREBIOTIC 1 | 22.81 <sup>a</sup><br>$\pm 6.21$  | 64.24 <sup>a</sup><br>$\pm 15.61$  | 13.01 <sup>a</sup><br>$\pm 2.38$                    | 26.22 <sup>a</sup><br>$\pm 8.17$     | 32.67 <sup>a</sup><br>$\pm 9.32$     | 0.81 <sup>a</sup><br>$\pm 0.17$        |
|                | PREBIOTIC 2 | 22.83 <sup>a</sup><br>$\pm 5.76$  | 66.35 <sup>a</sup><br>$\pm 8.15$   | 14.37 <sup>a</sup><br>$\pm 4.49$                    | 25.59 <sup>a</sup><br>$\pm 3.09$     | 35.71 <sup>a</sup><br>$\pm 6.48$     | 0.74 <sup>ab</sup><br>$\pm 0.18$       |
|                | SYNBIOTIC 1 | 36.58 <sup>b</sup><br>$\pm 6.37$  | 45.19 <sup>b</sup><br>$\pm 14.59$  | 15.64 <sup>a</sup><br>$\pm 3.71$                    | 14.55 <sup>b</sup><br>$\pm 5.93$     | 30.56 <sup>a</sup><br>$\pm 10.45$    | 0.50 <sup>b</sup><br>$\pm 0.17$        |
|                | SYNBIOTIC 2 | 21.04 <sup>a</sup><br>$\pm 3.68$  | 68.24 <sup>a</sup><br>$\pm 6.30$   | 20.65 <sup>a</sup><br>$\pm 8.84$                    | 26.61 <sup>a</sup><br>$\pm 5.27$     | 41.10 <sup>a</sup><br>$\pm 2.32$     | 0.65 <sup>ab</sup><br>$\pm 0.14$       |
| DEX-IMMUNIZED  | CONTROL     | 24.45<br>$\pm 3.15$               | 67.88 <sup>a</sup><br>$\pm 4.55$   | 12.74 <sup>a</sup><br>$\pm 2.28$                    | 25.09 <sup>a</sup><br>$\pm 7.57$     | 39.67 <sup>ab</sup><br>$\pm 4.57$    | 0.64 <sup>a</sup><br>$\pm 0.21$        |
|                | PREBIOTIC 1 | 25.18<br>$\pm 7.88$               | 62.59 <sup>a</sup><br>$\pm 4.18$   | 13.66 <sup>a</sup><br>$\pm 2.66$                    | 25.59 <sup>a</sup><br>$\pm 10.35$    | 29.80 <sup>ab</sup><br>$\pm 8.51$    | 0.85 <sup>a</sup><br>$\pm 0.29$        |
|                | PREBIOTIC 2 | 28.41<br>$\pm 7.57$               | 57.43 <sup>ab</sup><br>$\pm 7.15$  | 14.30 <sup>a</sup><br>$\pm 3.02$                    | 21.81 <sup>a</sup><br>$\pm 7.26$     | 29.14 <sup>a</sup><br>$\pm 6.25$     | 0.74 <sup>a</sup><br>$\pm 0.36$        |
|                | SYNBIOTIC 1 | 24.26<br>$\pm 7.80$               | 43.18 <sup>b</sup><br>$\pm 18.63$  | 13.61 <sup>a</sup><br>$\pm 2.69$                    | 20.74 <sup>a</sup><br>$\pm 7.95$     | 30.55 <sup>ab</sup><br>$\pm 12.37$   | 0.72 <sup>a</sup><br>$\pm 0.23$        |
|                | SYNBIOTIC 2 | 19.25<br>$\pm 5.66$               | 69.16 <sup>a</sup><br>$\pm 6.71$   | 27.21 <sup>b</sup><br>$\pm 11.55$                   | 22.78 <sup>a</sup><br>$\pm 4.62$     | 41.73 <sup>b</sup><br>$\pm 5.59$     | 0.55 <sup>a</sup><br>$\pm 0.14$        |

**Table S15.** The total count ( $\times 10^6$ ) of lymphocyte subsets in the spleen of 35-day-old chicken broilers after *in ovo* injection of the investigated prebiotics or synbiotics. The values are presented as mean  $\pm$  S.D.;  $n = 7$ . Data with different superscript letters show significant differences ( $p < 0.05$ ).

|                | Title       | Bu-1 <sup>+</sup>                    | CD3 <sup>+</sup>                      | CD3 <sup>+</sup><br>TCR $\gamma\delta$ <sup>+</sup> | CD3 <sup>+</sup><br>CD4 <sup>+</sup> | CD3 <sup>+</sup><br>CD8 <sup>+</sup> |
|----------------|-------------|--------------------------------------|---------------------------------------|-----------------------------------------------------|--------------------------------------|--------------------------------------|
| NON-IMMUNIZED  | CONTROL     | 672.56 <sup>ab</sup><br>$\pm 188.23$ | 2640.87 <sup>a</sup><br>$\pm 1164.22$ | 450.45 <sup>a</sup><br>$\pm 172.35$                 | 884.56 <sup>a</sup><br>$\pm 324.12$  | 1686.70 <sup>a</sup><br>$\pm 775.12$ |
|                | PREBIOTIC 1 | 1295.50 <sup>a</sup><br>$\pm 858.45$ | 1734.88 <sup>a</sup><br>$\pm 516.38$  | 478.28 <sup>a</sup><br>$\pm 149.67$                 | 686.40 <sup>a</sup><br>$\pm 263.51$  | 929.55 <sup>a</sup><br>$\pm 180.67$  |
|                | PREBIOTIC 2 | 693.18 <sup>ab</sup><br>$\pm 477.43$ | 2352.54 <sup>a</sup><br>$\pm 747.86$  | 510.26 <sup>a</sup><br>$\pm 209.12$                 | 958.08 <sup>a</sup><br>$\pm 251.62$  | 1156.68 <sup>a</sup><br>$\pm 353.06$ |
|                | SYNBIOTIC 1 | 800.79 <sup>ab</sup><br>$\pm 278.61$ | 1749.34 <sup>a</sup><br>$\pm 472.16$  | 482.08 <sup>a</sup><br>$\pm 79.59$                  | 653.09 <sup>a</sup><br>$\pm 208.59$  | 1074.61 <sup>a</sup><br>$\pm 297.88$ |
|                | SYNBIOTIC 2 | 565.54 <sup>b</sup><br>$\pm 220.15$  | 2174.21 <sup>a</sup><br>$\pm 364.37$  | 635.16 <sup>a</sup><br>$\pm 213.29$                 | 868.42 <sup>a</sup><br>$\pm 116.23$  | 1244.63 <sup>a</sup><br>$\pm 278.13$ |
| SRBC-IMMUNIZED | CONTROL     | 552.97 <sup>a</sup><br>$\pm 218.53$  | 2090.05 <sup>a</sup><br>$\pm 718.72$  | 391.40 <sup>a</sup><br>$\pm 145.22$ <sup>a</sup>    | 737.48 <sup>a</sup><br>$\pm 303.66$  | 1187.08 <sup>a</sup><br>$\pm 486.32$ |
|                | PREBIOTIC 1 | 755.65 <sup>ab</sup><br>$\pm 242.82$ | 2214.44 <sup>a</sup><br>$\pm 985.31$  | 434.74 <sup>a</sup><br>$\pm 153.17$                 | 885.98 <sup>a</sup><br>$\pm 355.71$  | 1150.65 <sup>a</sup><br>$\pm 612.84$ |
|                | PREBIOTIC 2 | 633.57 <sup>a</sup><br>$\pm 161.76$  | 1926.43 <sup>a</sup><br>$\pm 636.13$  | 428.81 <sup>a</sup><br>$\pm 216.91$                 | 727.10 <sup>a</sup><br>$\pm 176.43$  | 1052.39 <sup>a</sup><br>$\pm 429.12$ |
|                | SYNBIOTIC 1 | 1442.58 <sup>b</sup><br>$\pm 607.34$ | 1921.43 <sup>a</sup><br>$\pm 1221.36$ | 612.21 <sup>a</sup><br>$\pm 221.71$                 | 597.55 <sup>a</sup><br>$\pm 358.83$  | 1327.30 <sup>a</sup><br>$\pm 941.32$ |
|                | SYNBIOTIC 2 | 672.57 <sup>a</sup><br>$\pm 118.48$  | 2181.81 <sup>a</sup><br>$\pm 199.45$  | 679.96 <sup>a</sup><br>$\pm 368.85$                 | 845.87 <sup>a</sup><br>$\pm 122.66$  | 1321.56 <sup>a</sup><br>$\pm 165.27$ |
| DEX-IMMUNIZED  | CONTROL     | 887.11 <sup>a</sup><br>$\pm 383.58$  | 2528.90 <sup>a</sup><br>$\pm 1187.92$ | 448.71 <sup>a</sup><br>$\pm 162.24$                 | 980.43 <sup>a</sup><br>$\pm 602.76$  | 1500.46 <sup>a</sup><br>$\pm 811.18$ |
|                | PREBIOTIC 1 | 1038.02 <sup>a</sup><br>$\pm 204.01$ | 2734.04 <sup>a</sup><br>$\pm 934.31$  | 583.12 <sup>ab</sup><br>$\pm 154.45$                | 1130.28 <sup>a</sup><br>$\pm 521.05$ | 1315.43 <sup>a</sup><br>$\pm 547.13$ |
|                | PREBIOTIC 2 | 792.79 <sup>a</sup><br>$\pm 185.91$  | 1741.68 <sup>a</sup><br>$\pm 712.23$  | 412.48 <sup>a</sup><br>$\pm 122.09$                 | 703.25 <sup>a</sup><br>$\pm 205.31$  | 901.67 <sup>a</sup><br>$\pm 426.65$  |
|                | SYNBIOTIC 1 | 862.89 <sup>a</sup><br>$\pm 341.16$  | 1516.51 <sup>a</sup><br>$\pm 781.13$  | 477.73 <sup>ab</sup><br>$\pm 152.50$                | 718.29 <sup>a</sup><br>$\pm 317.24$  | 1066.50 <sup>a</sup><br>$\pm 490.19$ |
|                | SYNBIOTIC 2 | 592.87 <sup>a</sup><br>$\pm 159.35$  | 2196.58 <sup>a</sup><br>$\pm 580.81$  | 844.07 <sup>b</sup><br>$\pm 375.91$                 | 713.72 <sup>a</sup><br>$\pm 185.84$  | 1334.86 <sup>a</sup><br>$\pm 413.59$ |
